# Supplementary material for: Rapid Reversible Osmoregulation of Cytoplasmic Biomolecular Condensates of Human Interferon-α-Induced Antiviral MxA GTPase
Source: MDPI journal article supplement (doi:10.3390/ijms232112739), 2022-10-22
Supplement: s1 [file s1]

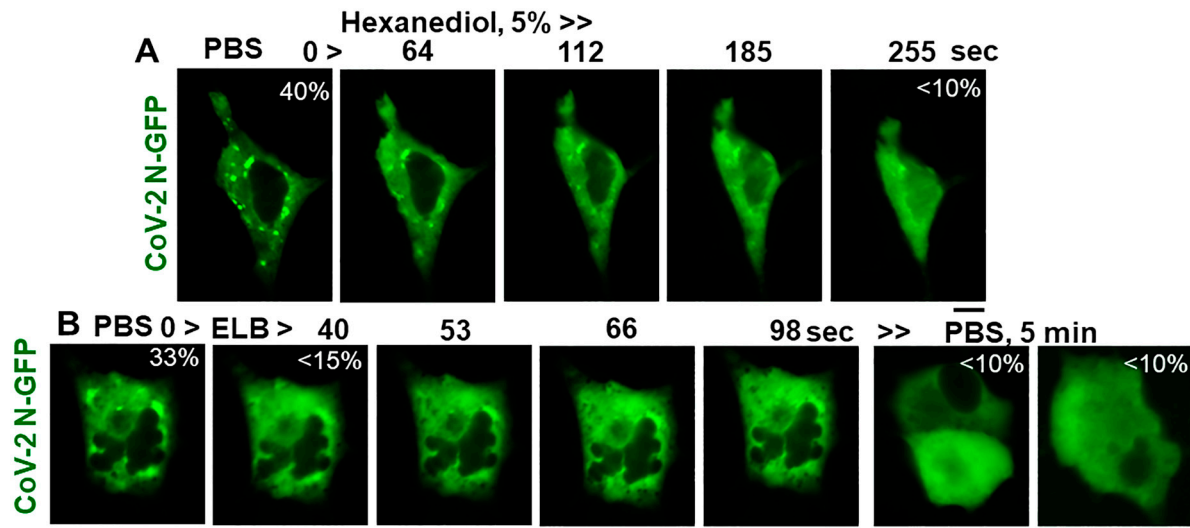

**Figure S1.** Properties of condensates formed by SARS-CoV-2 N-GFP. A549 cells in 35 mm plates were transiently transfected with an expression vector for SARS-CoV-2 N-GFP (Sino Biologicals) and the formation and properties of N-GFP condensates evaluated 2 days later. Panel (A), Live-cell time-lapse images of condensates in a cell in isotonic PBS, and after shifting to 5% hexanediol in PBS. Panel (B), Live-cell time-lapse images of condensates in a cell in isotonic PBS, and after shifting to hypotonic ELB; N-GFP-expressing cells in the same culture were also imaged 5 min after a further shift to isotonic PBS. All scale bars = 10  $\mu$ m.

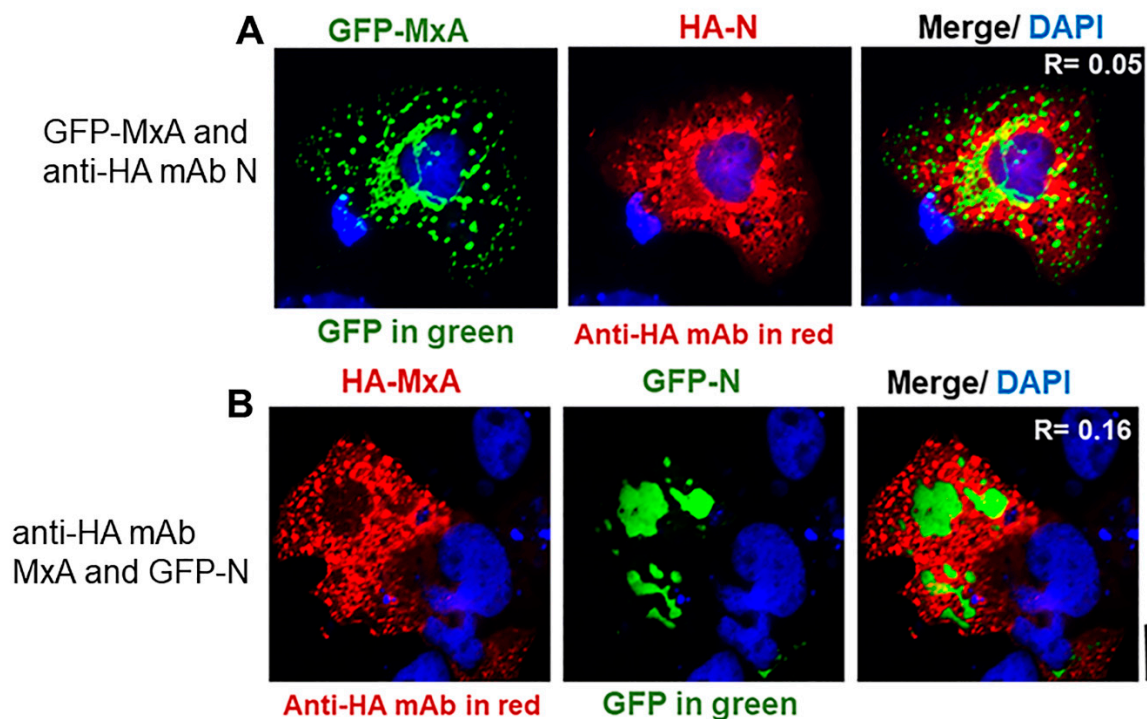

**Figure S2.** MxA and SARS-CoV-2 N protein form distinct condensates in the same cell. Huh7 cells in 35 mm plates were transiently transfected with pairwise combinations of respective GFP-tagged or HA-tagged vectors for MxA or SARS-CoV-2 N protein as indicated. The cultures were fixed (4% PFA) two days later, immunostained for HA (in red), and condensate formation by MxA and N protein evaluated by fluorescence imaging in green (for GFP) and

red (for HA). R is the Pearson's correlation coefficient between red and green; all scale bars = 10  $\mu$ m.

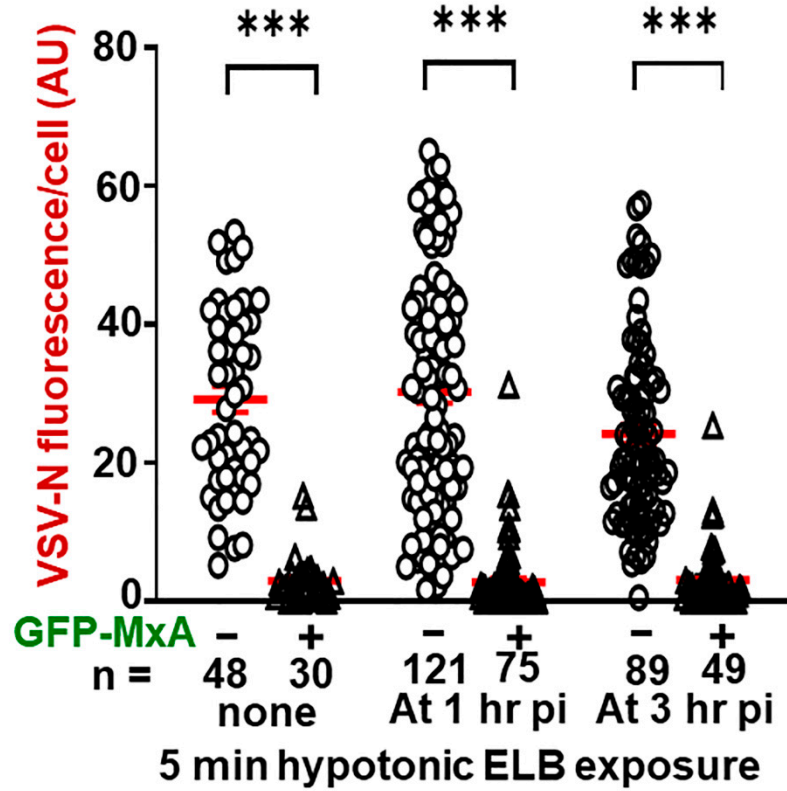

**Figure S3.** Antiviral activity of GFP-MxA against VSV in cultures subjected to one 5 min cycle of hypotonic disassembly/reassembly. Huh7 cells in 35 mm plates were transfected with the GFP-MxA vector, and 1 day later were infected with VSV (moi >10 pfu/cell) (13, 15). At one and 3 h after the beginning of the virus infection ("post-infection", indicated as pi in figure), respective cultures were shifted to hypotonic ELB for 5 min and then back to full medium. Live-cell microscopy confirmed the disassembly of GFP-MxA condensates when cell were shifted to ELB (not shown). All cultures were fixed at 4 h pi, and immunostained for VSV N protein (in red) (as in Refs. [44,46]). The VSV N protein fluorescence was quantitated in individual cells within the same culture without and with GFP-MxA (using Image J). n = number of cells evaluated per group in this experiment; horizontal red lines within each group indicate Mean  $\pm$ SE. Statistical significance was evaluated using one-way ANOVA (Kruskal-Wallis with Dunn's post hoc test for multiple comparisons); \*\*\*  $p < 0.001$ .

**Video S1.** Spontaneous reassembly of GFP-MxA condensates in an A549-hACE2 lung-cancer cell in one-fourth strength culture medium. Movie shows time-lapse imaging (5 s/frame) of an A549-hACE2 cell expressing GFP-MxA condensates (three days after transfection) was commenced upon changing to one-fourth strength hypotonic culture medium. (Video S1 uploaded separately).
